# Supplementary material
Source: Springer Nature journal article supplement (https://www.springermedizin.de/resource/supplementary/13017_2009_150_MOESM5_ESM.pdf/9635576)
Supplement: MOESM5 [file 9635576]

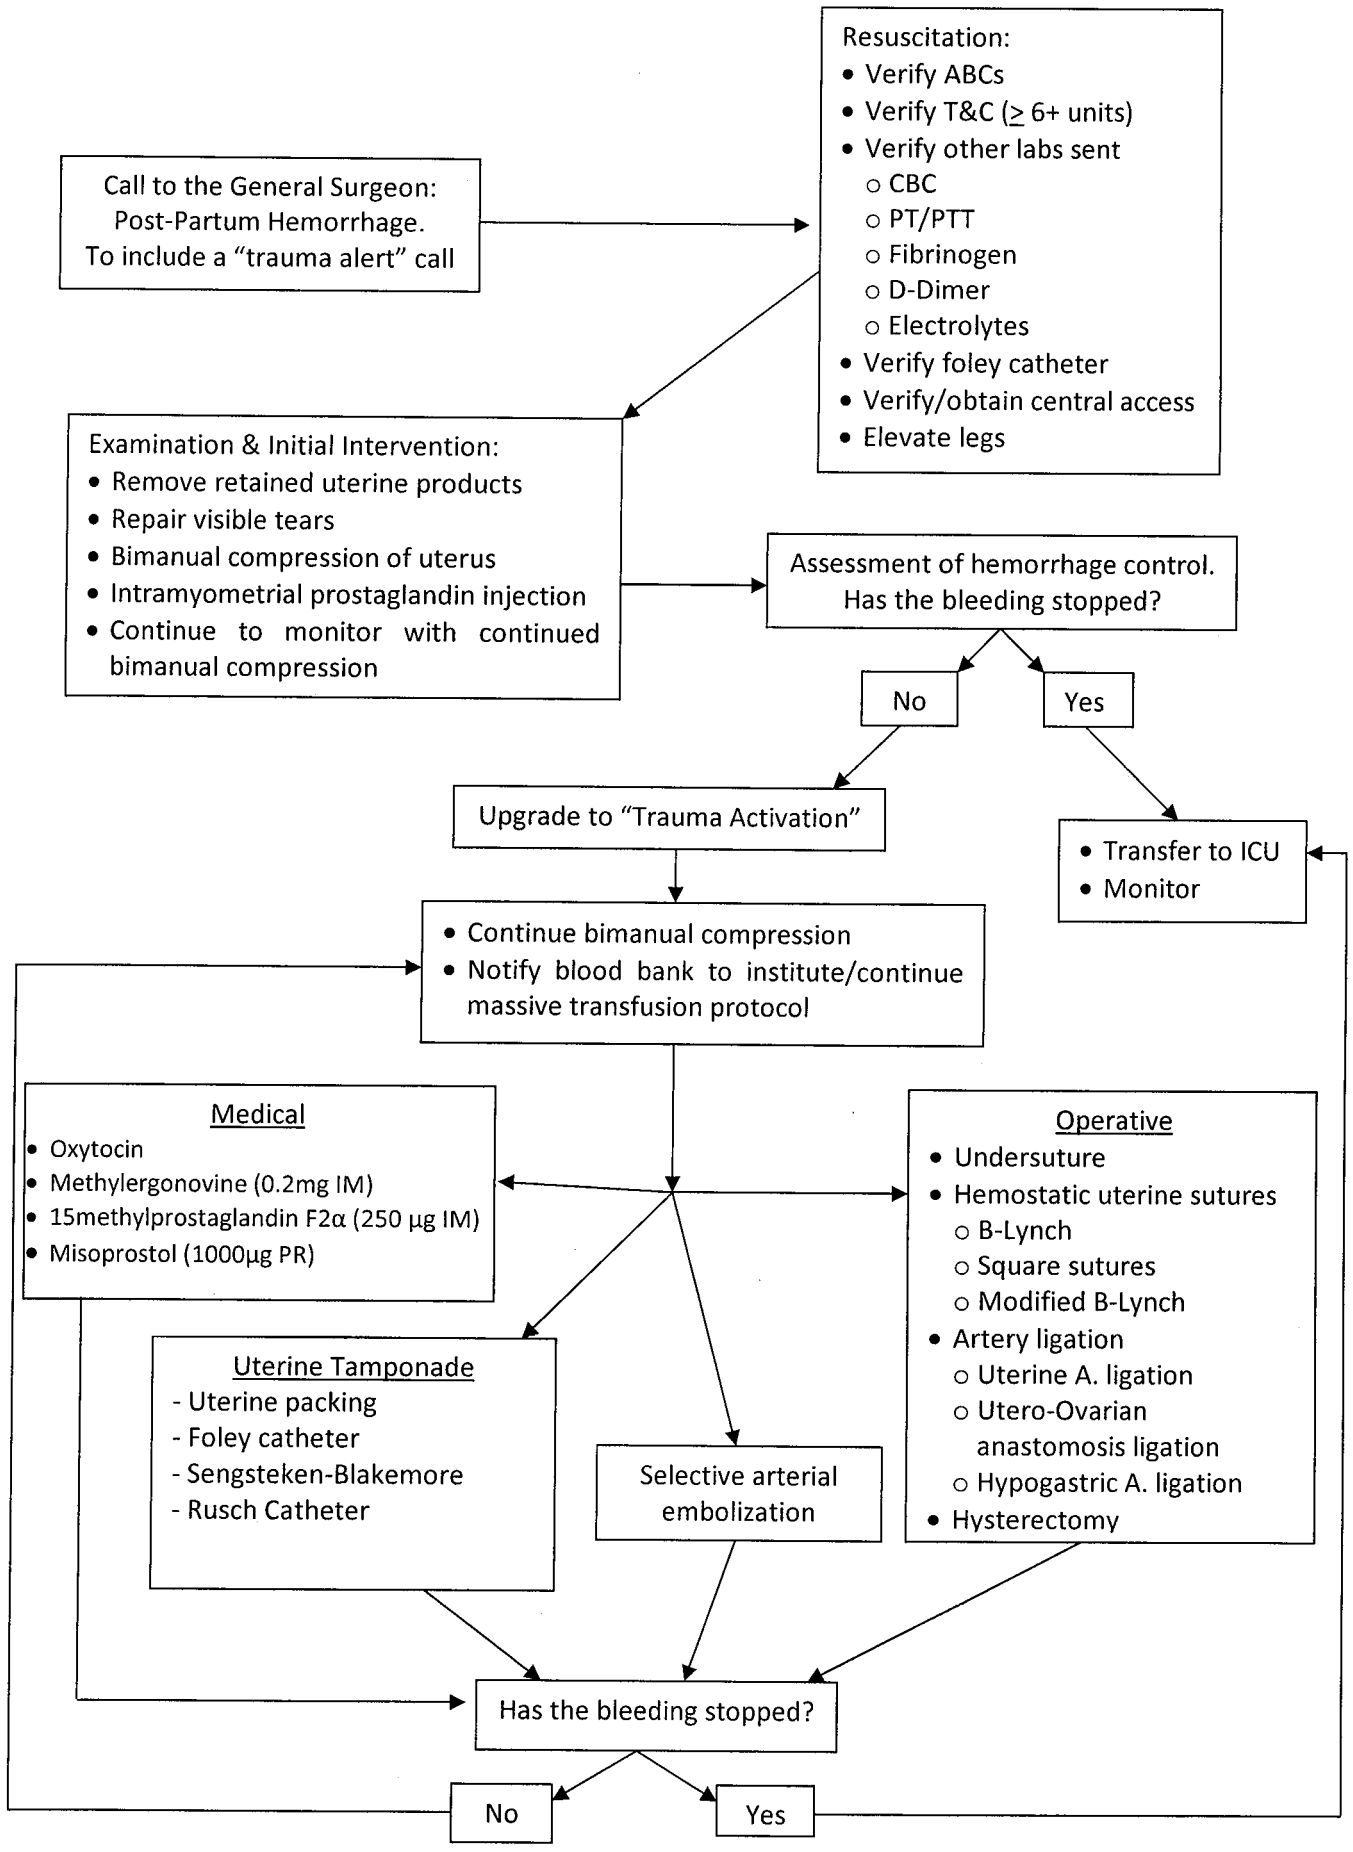

Call to the General Surgeon:  
Post-Partum Hemorrhage.  
To include a "trauma alert" call

- Resuscitation:**
- Verify ABCs
  - Verify T&C (≥ 6+ units)
  - Verify other labs sent
    - CBC
    - PT/PTT
    - Fibrinogen
    - D-Dimer
    - Electrolytes
  - Verify foley catheter
  - Verify/obtain central access
  - Elevate legs

- Examination & Initial Intervention:**
- Remove retained uterine products
  - Repair visible tears
  - Bimanual compression of uterus
  - Intramyometrial prostaglandin injection
  - Continue to monitor with continued bimanual compression

Assessment of hemorrhage control.  
Has the bleeding stopped?

No

Yes

Upgrade to "Trauma Activation"

- Transfer to ICU
- Monitor

- Continue bimanual compression
- Notify blood bank to institute/continue massive transfusion protocol

- Medical
- Oxytocin
  - Methylergonovine (0.2mg IM)
  - 15methylprostaglandin F2α (250 µg IM)
  - Misoprostol (1000µg PR)

- Operative
- Undersuture
  - Hemostatic uterine sutures
    - B-Lynch
    - Square sutures
    - Modified B-Lynch
  - Artery ligation
    - Uterine A. ligation
    - Utero-Ovarian anastomosis ligation
    - Hypogastric A. ligation
  - Hysterectomy

- Uterine Tamponade
- Uterine packing
  - Foley catheter
  - Sengstaken-Blakemore
  - Rusch Catheter

Selective arterial embolization

Has the bleeding stopped?

No

Yes
